# Supplementary material for: Association between TP53 mutation and high 21-gene recurrence score in estrogen receptor-positive/HER2-negative breast cancer
Source: PubMed Central journal article supplement (PMC8850427; doi:10.1038/s41523-022-00384-3), 2022-02-16
Supplement: 41523_2022_384_MOESM1_ESM.pdf [file 41523_2022_384_MOESM1_ESM.pdf]

**Supplementary Fig. 1 Association between *TP53* mutation and Oncotype DX® recurrence score (RS) (PR<sup>+</sup>/low-HG/low-Ki-67).** **a** Means of Oncotype DX® RS according to the *TP53* mutation were compared using the Student's *t*-test (\*\*\*)  $p$ -value <0.001). Error bars correspond to standard error of the mean. **b** Oncotype DX® risk group distribution according to *TP53* mutation. The distributions of the Oncotype DX® risk group were compared based on the *TP53* mutation using the Fisher's exact test ( $p$ <0.001).

**a**

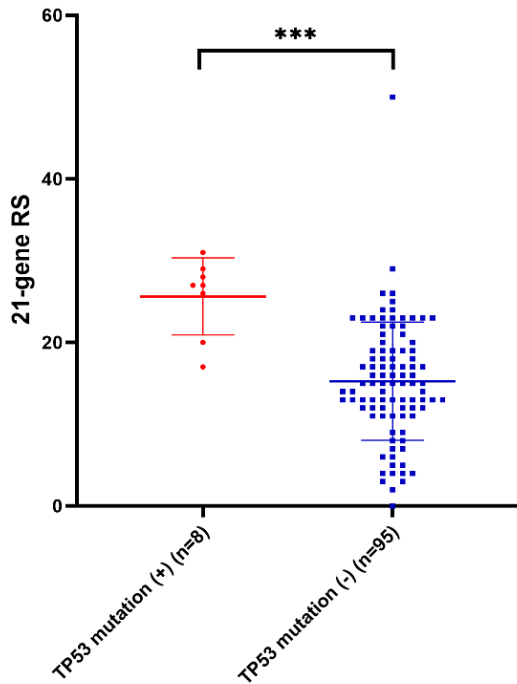

**b**

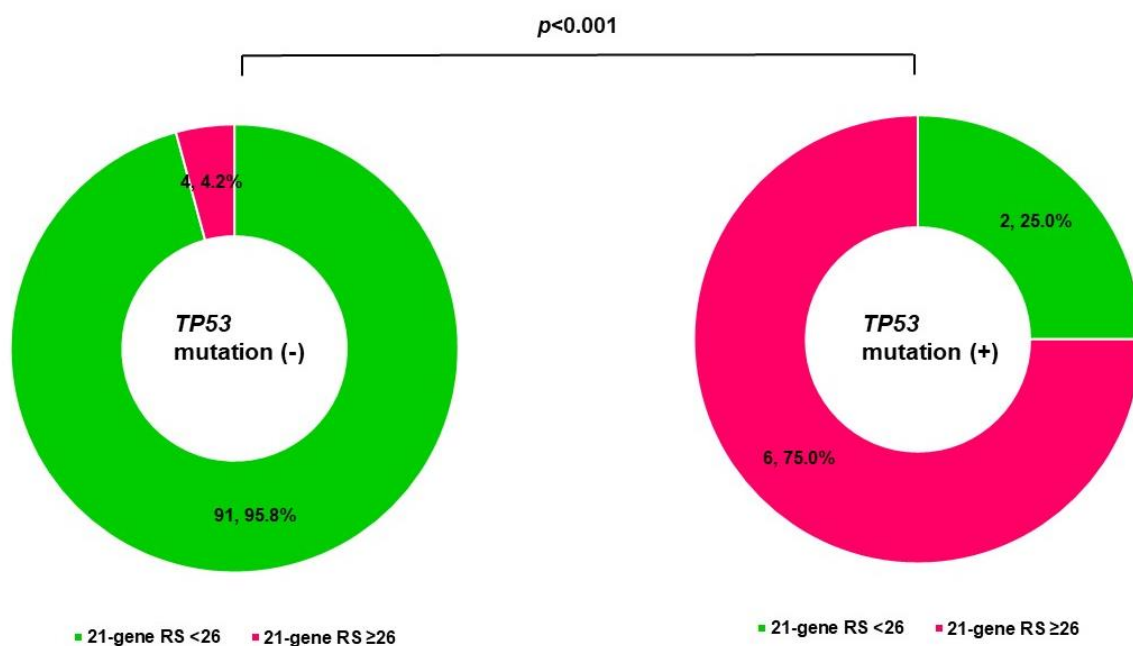

**Supplementary Fig. 2 Kaplan-Meier survival plots of distant recurrence-free survival (DRFS) based on binary 21-gene recurrence score (RS) ( $\geq 26$  vs.  $< 26$ ).** Distant recurrence-free survival does not significantly differ according to 21-gene RS ( $p = 0.11$ ).

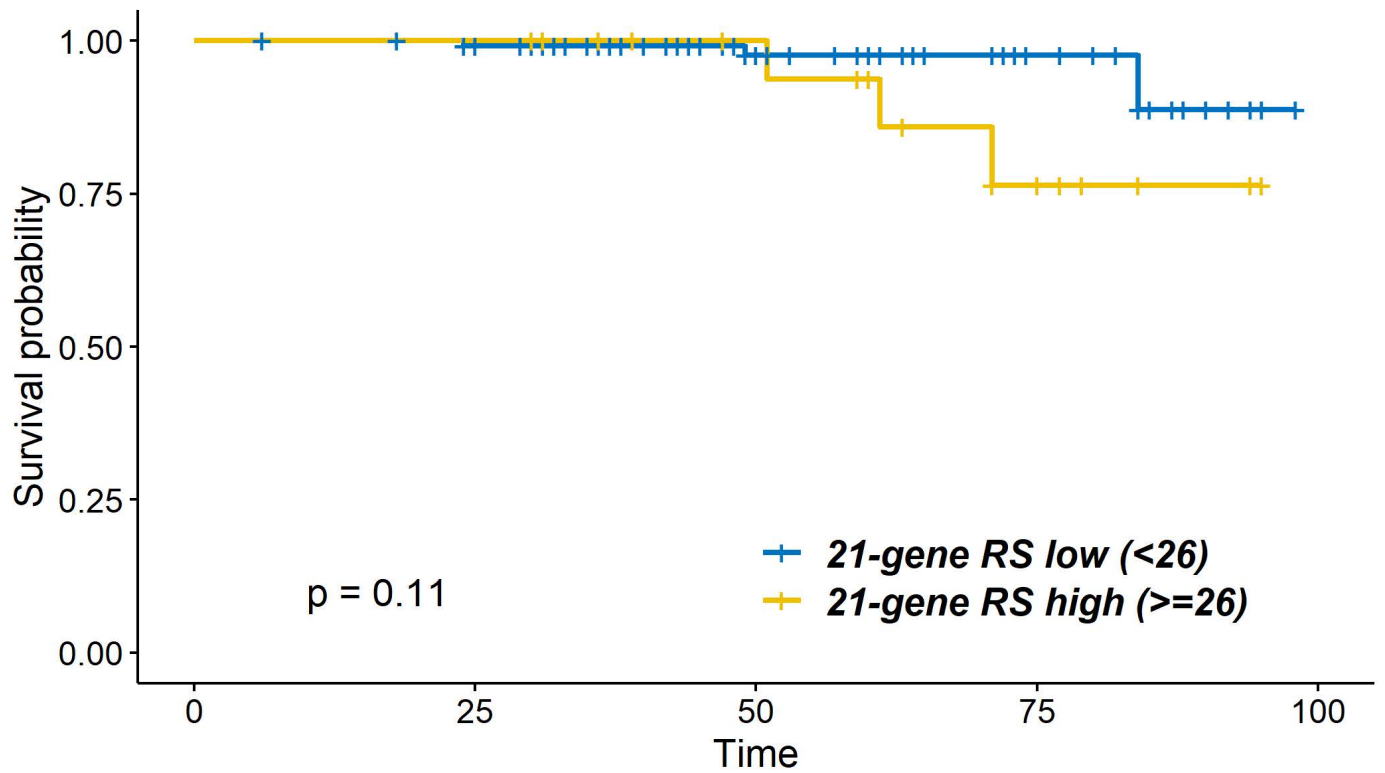

Number at risk (number censored)

|         |         |         |          |         |
|---------|---------|---------|----------|---------|
| 119 (0) | 114 (6) | 60 (62) | 15 (102) | 0 (116) |
| 22 (0)  | 22 (0)  | 16 (6)  | 7 (13)   | 0 (19)  |

**Supplementary Fig. 3 Consort diagram.** Among 141 patients, 69 and 72 were respectively analyzed using polymerase chain reaction (PCR)-denaturing high-performance liquid chromatography (DHPLC), and targeted next-generation sequencing (NGS).

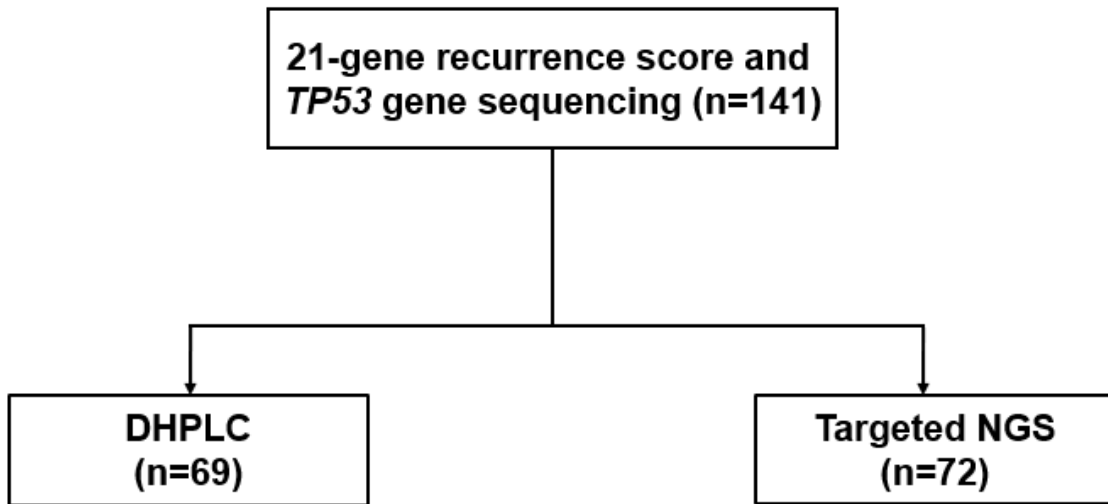

**Supplementary Fig. 4 Genomic spectrum of 72 patients determined using targeted NGS.** First row indicates status of *TP53* mutation. *PIK3CA* mutation is the most common, with 31 (43.1%) of the 72 patients in the cohort harboring this mutation. Among seven patients with *TP53* mutations, four (57.1%) also had a mutated *PIK3CA* gene. Each vertical line indicates one patient.

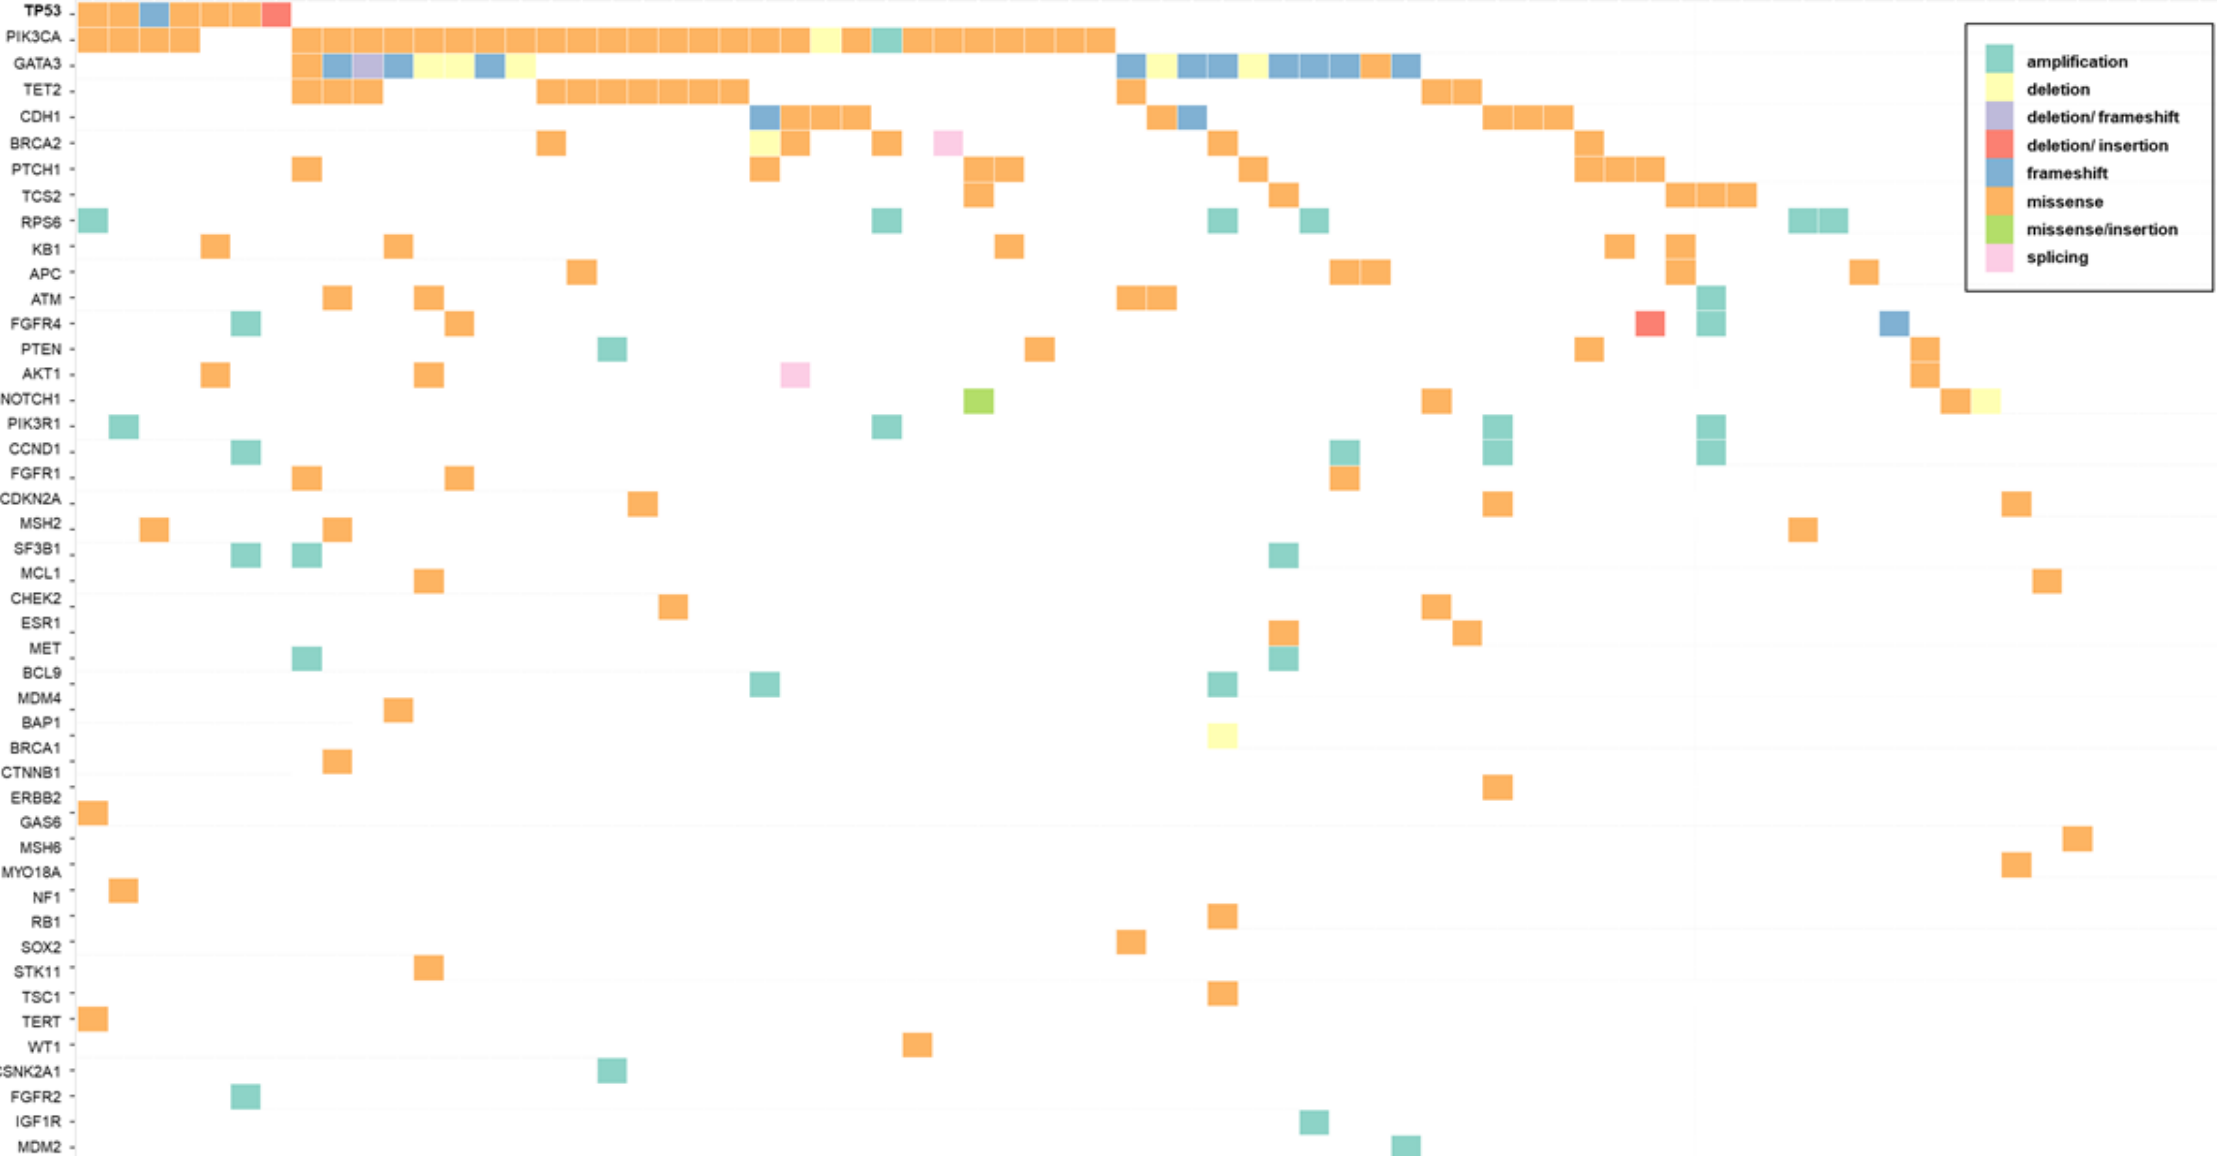

**Supplementary Table 1.** Baseline characteristics of patients (PR<sup>+</sup>/low-HG/low-Ki-67).

| Variables                      | TP53 mutation-<br>(n=95) | TP53 mutation+<br>(n=8) | Total<br>(n=103) | P <sup>a</sup>     |
|--------------------------------|--------------------------|-------------------------|------------------|--------------------|
| Median age (y; range)          | 47.0 (26–75)             | 59.5 (45–63)            | 47.0 (26–75)     | 0.006 <sup>b</sup> |
| Menopausal status              |                          |                         |                  | 0.004              |
| Premenopausal                  | 64 (67.4%)               | 1 (12.5%)               | 65 (63.1%)       |                    |
| Postmenopausal                 | 31 (32.6%)               | 7 (87.5%)               | 38 (36.9%)       |                    |
| Estrogen receptor <sup>c</sup> |                          |                         |                  | 0.532              |
| Low                            | 8 (8.4%)                 | 1 (12.5%)               | 9 (8.7%)         |                    |
| High                           | 87 (91.6%)               | 7 (87.5%)               | 94 (91.3%)       |                    |
| T stage                        |                          |                         |                  | 0.031              |
| 1                              | 51 (53.7%)               | 1 (12.5%)               | 52 (50.5%)       |                    |
| 2 or 3                         | 44 (46.3%)               | 7 (87.5%)               | 51 (49.5%)       |                    |
| N stage                        |                          |                         |                  | 0.701              |
| 0                              | 66 (69.5%)               | 5 (62.5%)               | 71 (68.9%)       |                    |
| 1 or 2                         | 29 (30.5%)               | 3 (37.5%)               | 32 (31.1%)       |                    |
| Nuclear grade                  |                          |                         |                  | 0.591              |
| 1 or 2                         | 82 (86.3%)               | 8 (100.0%)              | 90 (87.4%)       |                    |
| 3                              | 13 (13.7%)               | 0 (0.0%)                | 13 (12.6%)       |                    |
| LVI <sup>d</sup>               |                          |                         |                  | 0.202              |
| Negative                       | 72 (75.8%)               | 4 (50.0%)               | 76 (73.8%)       |                    |
| Positive                       | 23 (24.2%)               | 4 (50.0%)               | 27 (26.2%)       |                    |
| Chemotherapy                   |                          |                         |                  | <0.001             |
| Not done                       | 82 (86.3%)               | 2 (25.0%)               | 84 (81.6%)       |                    |
| Done                           | 13 (13.7%)               | 6 (75.0%)               | 19 (18.4%)       |                    |
| Endocrine therapy              |                          |                         |                  | 0.008              |
| Tamoxifen                      | 61 (64.2%)               | 1 (12.5%)               | 62 (60.2%)       |                    |
| AI                             | 33 (34.7%)               | 7 (87.5%)               | 40 (38.8%)       |                    |
| Fulvestrant                    | 1 (1.1%)                 | 0 (0.0%)                | 1 (1.0%)         |                    |
| Radiotherapy                   |                          |                         |                  | 0.141              |
| Not done                       | 40 (42.1%)               | 1 (12.5%)               | 41 (39.8%)       |                    |
| Done                           | 55 (57.9%)               | 7 (87.5%)               | 62 (60.2%)       |                    |

<sup>a</sup>Fisher's exact test except <sup>b</sup>Mann–Whitney U test

<sup>c</sup>High, Allred score 5-8; Low, Allred score 2-4

<sup>d</sup>Lymphovascular invasion

**Supplementary Table 2.** Odds ratio (OR) and 95% confidential intervals (CIs) for high Oncotype DX® recurrence score ( $\geq 26$ ) (PR<sup>+</sup>/low-HG/low-Ki-67).

| Variables                      | Univariable             |                    | Multivariable           |        |
|--------------------------------|-------------------------|--------------------|-------------------------|--------|
|                                | OR (95% CI)             | P                  | OR (95% CI)             | P      |
| T stage                        |                         |                    |                         |        |
| 1                              | Ref                     |                    | -                       | -      |
| 2 or 3                         | 4.651 (0.937–23.088)    | 0.060              | -                       | -      |
| N stage                        |                         |                    |                         |        |
| Negative                       | Ref                     |                    |                         |        |
| Positive                       | 0.525 (0.105–2.625)     | 0.433              |                         |        |
| Estrogen receptor <sup>a</sup> |                         |                    |                         |        |
| High                           | Ref                     |                    |                         |        |
| Low                            | N/A <sup>b</sup>        |                    |                         |        |
| Nuclear grade                  |                         |                    |                         |        |
| 1 or 2                         | Ref                     |                    |                         |        |
| 3                              | 0.860 (0.793–0.934)     | 0.355 <sup>b</sup> |                         |        |
| LVI <sup>c</sup>               |                         |                    |                         |        |
| Negative                       | Ref                     |                    |                         |        |
| Positive                       | 0.680 (0.135–3.422)     | 0.640              |                         |        |
| TP53 mutation                  |                         |                    |                         |        |
| Negative                       | Ref                     |                    | Ref                     |        |
| Positive                       | 68.250 (10.334–450.751) | <0.001             | 68.250 (10.334–450.751) | <0.001 |

<sup>a</sup>High, Allred score 5-8; Low, Allred score 2-4

<sup>b</sup>Not analysed due to no event

<sup>c</sup>Fisher's exact test

<sup>d</sup>Lymphovascular invasion

**Supplementary Table 3.** PAM50 subtype distribution and MDM2/4 amplification according to *TP53* mutation.

| Variables         | TP53 mutation-<br>(n=297) | TP53 mutation+<br>(n=59) | Total<br>(n=356) | P                   |
|-------------------|---------------------------|--------------------------|------------------|---------------------|
| PAM-50 subtype    |                           |                          |                  | <0.001 <sup>a</sup> |
| Luminal A         | 234 (78.8%)               | 29 (49.2%)               | 263 (73.9%)      |                     |
| Luminal B         | 55 (18.5%)                | 27 (45.8%)               | 82 (23.0%)       |                     |
| HER2-enriched     | 0 (0.0%)                  | 1 (1.7%)                 | 1 (0.3%)         |                     |
| Basal-like        | 1 (0.3%)                  | 1 (1.7%)                 | 2 (0.6%)         |                     |
| Normal-like       | 7 (2.4%)                  | 1 (1.7%)                 | 8 (2.2%)         |                     |
| MDM2 <sup>c</sup> |                           |                          |                  | 0.999 <sup>b</sup>  |
| No amplification  | 281 (96.6%)               | 57 (96.6%)               | 338 (96.6%)      |                     |
| Amplification     | 10 (3.4%)                 | 2 (3.4%)                 | 12 (3.4%)        |                     |
| MDM4 <sup>c</sup> |                           |                          |                  | 0.267 <sup>b</sup>  |
| No amplification  | 255 (87.6%)               | 55 (93.2%)               | 310 (88.6%)      |                     |
| Amplification     | 36 (12.4%)                | 4 (6.8%)                 | 40 (11.4%)       |                     |

<sup>a</sup> $\chi^2$  test

<sup>b</sup>Fisher's exact test

<sup>c</sup>Six missing values in the MDM2/4 amplification test

**Supplementary Table 4.** Somatic mutations and amplification identified in 141 patients

| Patient ID | Cohort     | Gene   | cHGVS                              | pHGVS                                      | Amplification |
|------------|------------|--------|------------------------------------|--------------------------------------------|---------------|
| 1          | Target NGS | MSH6   | c.1063G>A                          | p.Gly355Ser                                | No            |
| 2          | Target NGS | PIK3CA | c.1663G>A                          | p.Glu545Lys                                | No            |
| 3          | Target NGS | AKT    | c.49G>A                            | p.Glu17Lys                                 | No            |
| 4          | Target NGS | PIK3R1 | c.1770_1711delAAC                  | p.Lys567_Leu570del                         | No            |
| 4          | Target NGS | CDH1   | c.2494G>A                          | p.Val832Met                                | No            |
| 5          | Target NGS | .      | .                                  | .                                          | No            |
| 6          | Target NGS | PIK3CA | c.3140A>G                          | p.His1047Arg                               | No            |
| 7          | Target NGS | .      | .                                  | .                                          | No            |
| 8          | Target NGS | PIK3CA | c.1636C>A<br>c.3061T>C             | p.Gln546Lys<br>p.Tyr1021His                | No            |
| 9          | Target NGS | .      | .                                  | .                                          | No            |
| 10         | Target NGS | PIK3CA | c.1625A>T<br>c.3204C>G             | p.Glu542Val<br>p.Asn1068Lys                | No            |
| 10         | Target NGS | ESR1   | c.1613A>G                          | p.Asp538Gly                                | No            |
| 11         | Target NGS | PIK3CA | c.1633G>A                          | p.Glu545Lys                                | No            |
| 11         | Target NGS | AKT1   | c.49G>A                            | p.Glu17Lys                                 | No            |
| 12         | Target NGS | PIK3CA | c.3140A>G                          | p.His1047Arg                               | No            |
| 13         | Target NGS | ERBB2  | c.2332_2340dup                     | p.Gly778_Pro780dup                         | No            |
| 13         | Target NGS | FGFR1  | .                                  | .                                          | Yes           |
| 13         | Target NGS | CCND1  | .                                  | .                                          | Yes           |
| 14         | Target NGS | PIK3CA | c.1634A>G                          | p.Glu545Gly                                | No            |
| 15         | Target NGS | PIK3CA | c.353G>A                           | p.Gly118Asp                                | No            |
| 16         | Target NGS | .      | .                                  | .                                          | No            |
| 17         | Target NGS | PIK3CA | c.3140A>G                          | p.His1047Arg                               | No            |
| 17         | Target NGS | TP53   | c.524G>A                           | p.Arg175His                                | No            |
| 17         | Target NGS | CCND1  | .                                  | .                                          | Yes           |
| 18         | Target NGS | PIK3R1 | c.1351_1356delGA                   | p.Glu451_Tyr452del                         | No            |
| 19         | Target NGS | PIK3CA | c.328_330delGAA                    | p.Glu110del                                | No            |
| 20         | Target NGS | PIK3CA | c.3140A>G                          | p.His1047Arg                               | No            |
| 20         | Target NGS | PTEN   | c.376G>A                           | p.Ala126Thr                                | No            |
| 21         | Target NGS | PIK3R1 | c.485G>T                           | p.Arg162Leu                                | No            |
| 22         | Target NGS | .      | .                                  | .                                          | No            |
| 23         | Target NGS | PIK3CA | c.1035T>A                          | p.Asn345Lys                                | No            |
| 24         | Target NGS | .      | .                                  | .                                          | No            |
| 25         | Target NGS | PIK3CA | c.1357G>A<br>c.353G>A<br>c.3140A>G | p.Glu453Lys<br>p.Gly118Asp<br>p.His1047Arg | No            |
| 26         | Target NGS | PIK3CA | c.3140A>T                          | p.His1047Leu                               | No            |



|    |            |        |                        |                              |    |
|----|------------|--------|------------------------|------------------------------|----|
| 27 | Target NGS | PIK3CA | c.1633G>A              | p.Glu545Lys                  | No |
| 28 | Target NGS | .      | .                      | .                            | No |
| 29 | Target NGS | PIK3CA | c.1133G>A<br>c.3140A>G | p.Cys378Tyr<br>p.His1047Arg  | No |
| 30 | Target NGS | PIK3CA | c.3140A>G              | p.His1047Arg                 | No |
| 30 | Target NGS | TP53   | c.396G>C               | p.Lys132Asn                  | No |
| 31 | Target NGS | .      | .                      | .                            | No |
| 32 | Target NGS | .      | .                      | .                            | No |
| 33 | Target NGS | .      | .                      | .                            | No |
| 34 | Target NGS | .      | .                      | .                            | No |
| 35 | Target NGS | PIK3CA | c.3140A>G              | p.His1047Arg                 | No |
| 35 | Target NGS | BRCA2  | c.8488-1G>A            | .                            | No |
| 36 | Target NGS | .      | .                      | .                            | No |
| 37 | Target NGS | .      | .                      | .                            | No |
| 38 | Target NGS | RB1    | c.1578dup              | p.Asp527Ter                  | No |
| 38 | Target NGS | BRCA1  | 17q21.31del            | .                            | No |
| 39 | Target NGS | CHEK2  | c.1111C>T              | p.His371Tyr                  | No |
| 40 | Target NGS | .      | .                      | .                            | No |
| 41 | Target NGS | .      | .                      | .                            | No |
| 42 | Target NGS | .      | .                      | .                            | No |
| 43 | Target NGS | .      | .                      | .                            | No |
| 44 | Target NGS | PIK3CA | c.3140A>G              | p.His1047Arg                 | No |
| 44 | Target NGS | BRCA2  | 13q13.1del             | .                            | No |
| 45 | Target NGS | PIK3CA | c.3140A>G              | p.His1047Arg                 | No |
| 46 | Target NGS | PIK3CA | c.3140A>G              | p.His1047Arg                 | No |
| 46 | Target NGS | TP53   | c.445_446delTC         | p.Ser149fs                   | No |
| 47 | Target NGS | PTEN   | c.328dup               | p.Gln110fs                   | No |
| 48 | Target NGS | PIK3CA | c.1633G>A              | p.Glu545Lys                  | No |
| 49 | Target NGS | .      | .                      | .                            | No |
| 50 | Target NGS | PIK3CA | c.1633G>A              | p.Glu545Lys                  | No |
| 50 | Target NGS | CHEK2  | c.1111C>T              | p.His371Tyr                  | No |
| 51 | Target NGS | .      | .                      | .                            | No |
| 52 | Target NGS | PIK3CA | c.1624G>A              | p.Glu542Lys                  | No |
| 53 | Target NGS | PTEN   | c91_79+1delinesGTC     | .                            | No |
| 54 | Target NGS | TP53   | c.532_533insCCT        | p.His139delinsProTyr         | No |
| 55 | Target NGS | .      | .                      | .                            | No |
| 56 | Target NGS | PIK3CA | c.1633G>A              | p.Glu545Lys                  | No |
| 57 | Target NGS | PIK3CA | c.3140A>G<br>c.3140A>T | p.His1047Arg<br>p.His1047Leu | No |
| 58 | Target NGS | .      | .                      | .                            | No |
| 59 | Target NGS | PIK3CA | c.1035T>A              | p.Asn345Lys                  | No |
| 60 | Target NGS | BRCA2  | c.7480C>T              | p.Arg2494Ter                 | No |

|    |                   |        |                        |                                    |     |
|----|-------------------|--------|------------------------|------------------------------------|-----|
| 60 | Target NGS        | AKT1   | c.49G>A                | p.Glu17Lys                         | No  |
| 61 | Target NGS        | FGFR1  | .                      | .                                  | Yes |
| 61 | Target NGS        | PTEN   | 10q23.31del            | .                                  | No  |
| 61 | Target NGS        | CCND1  | .                      | .                                  | Yes |
| 62 | Target NGS        | .      | .                      | .                                  | No  |
| 63 | Target NGS        | FGFR1  | .                      | .                                  | Yes |
| 64 | Target NGS        | PIK3CA | c.1633G>A              | p.Glu545Lys                        | No  |
| 64 | Target NGS        | PIK3R1 | c.1705_1706insTCA      | p.Pro568.Asp569<br>insValIleLysPro | No  |
| 65 | Target NGS        | .      | .                      | .                                  | No  |
| 66 | Target NGS        | TP53   | c.823T>C               | p.Cys275Arg                        | No  |
| 66 | Target NGS        | FGFR1  | .                      | .                                  | Yes |
| 66 | Target NGS        | PTEN   | 10q23.31del            | .                                  | No  |
| 66 | Target NGS        | FGFR2  | .                      | .                                  | Yes |
| 67 | Target NGS        | BRCA2  | c.1399A>T              | p.Lys467Ter                        | No  |
| 67 | Target NGS        | PIK3CA | .                      | .                                  | Yes |
| 67 | Target NGS        | CCND1  | .                      | .                                  | Yes |
| 68 | Target NGS        | PIK3CA | c.1035T>A              | p.Asn345Lys                        | No  |
| 69 | Target NGS        | .      | .                      | .                                  | No  |
| 70 | Target NGS        | TP53   | c.578A>G               | p.His193Arg                        | No  |
| 71 | Target NGS        | .      | .                      | .                                  | No  |
| 72 | Target NGS        | PIK3CA | c.1633G>C<br>c.3140A>G | p.Glu545Gln<br>p.His1047Arg        | No  |
| 72 | Target NGS        | TP53   | c.1024C>T              | p.Arg342Ter                        | No  |
| 73 | Sanger sequencing | TP53   | .                      | .                                  | No  |
| 74 | Sanger sequencing | TP53   | .                      | .                                  | No  |
| 75 | Sanger sequencing | TP53   | c.880G>T               | p.E294*                            | No  |
| 76 | Sanger sequencing | TP53   | .                      | .                                  | No  |
| 77 | Sanger sequencing | TP53   | c.880delG              | p.Glu294Serfs*51                   | No  |
| 78 | Sanger sequencing | TP53   | .                      | .                                  | No  |
| 79 | Sanger sequencing | TP53   | .                      | .                                  | No  |
| 80 | Sanger sequencing | TP53   | .                      | .                                  | No  |
| 81 | Sanger sequencing | TP53   | .                      | .                                  | No  |
| 82 | Sanger sequencing | TP53   | .                      | .                                  | No  |
| 83 | Sanger sequencing | TP53   | .                      | .                                  | No  |
| 84 | Sanger sequencing | TP53   | .                      | .                                  | No  |
| 85 | Sanger sequencing | TP53   | .                      | .                                  | No  |
| 86 | Sanger sequencing | TP53   | .                      | .                                  | No  |
| 87 | Sanger sequencing | TP53   | .                      | .                                  | No  |
| 88 | Sanger sequencing | TP53   | c.701A>G               | p.Tyr234Cys                        | No  |
| 89 | Sanger sequencing | TP53   | c.742C>T               | p.Arg248Trp                        | No  |
| 90 | Sanger sequencing | TP53   | c.833C>G               | p.Pro278Arg                        | No  |

|     |                   |      |            |                  |    |
|-----|-------------------|------|------------|------------------|----|
| 91  | Sanger sequencing | TP53 | .          | .                | No |
| 92  | Sanger sequencing | TP53 | .          | .                | No |
| 93  | Sanger sequencing | TP53 | c.649delG  | p.Val217Trpfs*30 | No |
| 94  | Sanger sequencing | TP53 | .          | .                | No |
| 95  | Sanger sequencing | TP53 | .          | .                | No |
| 96  | Sanger sequencing | TP53 | .          | .                | No |
| 97  | Sanger sequencing | TP53 | .          | .                | No |
| 98  | Sanger sequencing | TP53 | .          | .                | No |
| 99  | Sanger sequencing | TP53 | .          | .                | No |
| 100 | Sanger sequencing | TP53 | .          | .                | No |
| 101 | Sanger sequencing | TP53 | .          | .                | No |
| 102 | Sanger sequencing | TP53 | .          | .                | No |
| 103 | Sanger sequencing | TP53 | .          | .                | No |
| 104 | Sanger sequencing | TP53 | .          | .                | No |
| 105 | Sanger sequencing | TP53 | .          | .                | No |
| 106 | Sanger sequencing | TP53 | .          | .                | No |
| 107 | Sanger sequencing | TP53 | c.782+2T>A | .                | No |
| 108 | Sanger sequencing | TP53 | .          | .                | No |
| 109 | Sanger sequencing | TP53 | .          | .                | No |
| 110 | Sanger sequencing | TP53 | .          | .                | No |
| 111 | Sanger sequencing | TP53 | c.638G>A   | p.Arg213Gln      | No |
| 112 | Sanger sequencing | TP53 | .          | .                | No |
| 113 | Sanger sequencing | TP53 | .          | .                | No |
| 114 | Sanger sequencing | TP53 | .          | .                | No |
| 115 | Sanger sequencing | TP53 | .          | .                | No |
| 116 | Sanger sequencing | TP53 | c.559+1G>T | .                | No |
| 117 | Sanger sequencing | TP53 | .          | .                | No |
| 118 | Sanger sequencing | TP53 | .          | .                | No |
| 119 | Sanger sequencing | TP53 | c.146delA  | p.Asp49Val*fs74  | No |
| 120 | Sanger sequencing | TP53 | .          | .                | No |
| 121 | Sanger sequencing | TP53 | c.430C>T   | p.Gln144Ter      | No |
| 122 | Sanger sequencing | TP53 | .          | .                | No |
| 123 | Sanger sequencing | TP53 | .          | .                | No |
| 124 | Sanger sequencing | TP53 | .          | .                | No |
| 125 | Sanger sequencing | TP53 | .          | .                | No |
| 126 | Sanger sequencing | TP53 | .          | .                | No |
| 127 | Sanger sequencing | TP53 | .          | .                | No |
| 128 | Sanger sequencing | TP53 | .          | .                | No |
| 129 | Sanger sequencing | TP53 | .          | .                | No |
| 130 | Sanger sequencing | TP53 | .          | .                | No |
| 131 | Sanger sequencing | TP53 | .          | .                | No |

|     |                   |      |   |   |    |
|-----|-------------------|------|---|---|----|
| 132 | Sanger sequencing | TP53 | . | . | No |
| 133 | Sanger sequencing | TP53 | . | . | No |
| 134 | Sanger sequencing | TP53 | . | . | No |
| 135 | Sanger sequencing | TP53 | . | . | No |
| 136 | Sanger sequencing | TP53 | . | . | No |
| 137 | Sanger sequencing | TP53 | . | . | No |
| 138 | Sanger sequencing | TP53 | . | . | No |
| 139 | Sanger sequencing | TP53 | . | . | No |
| 140 | Sanger sequencing | TP53 | . | . | No |
| 141 | Sanger sequencing | TP53 | . | . | No |

**Abbreviations:** cHGVS, coding DNA reference sequence Human Genome Variation Society; pHGVS, protein reference sequence Human Genome Variation Society.
